# Supplementary material for: Construction of A High-Density Genetic Map and Mapping of Fruit Traits in Watermelon (Citrullus Lanatus L.) Based on Whole-Genome Resequencing
Source: MDPI journal article supplement (doi:10.3390/ijms19103268), 2018-10-21
Supplement: s1 [file s1]

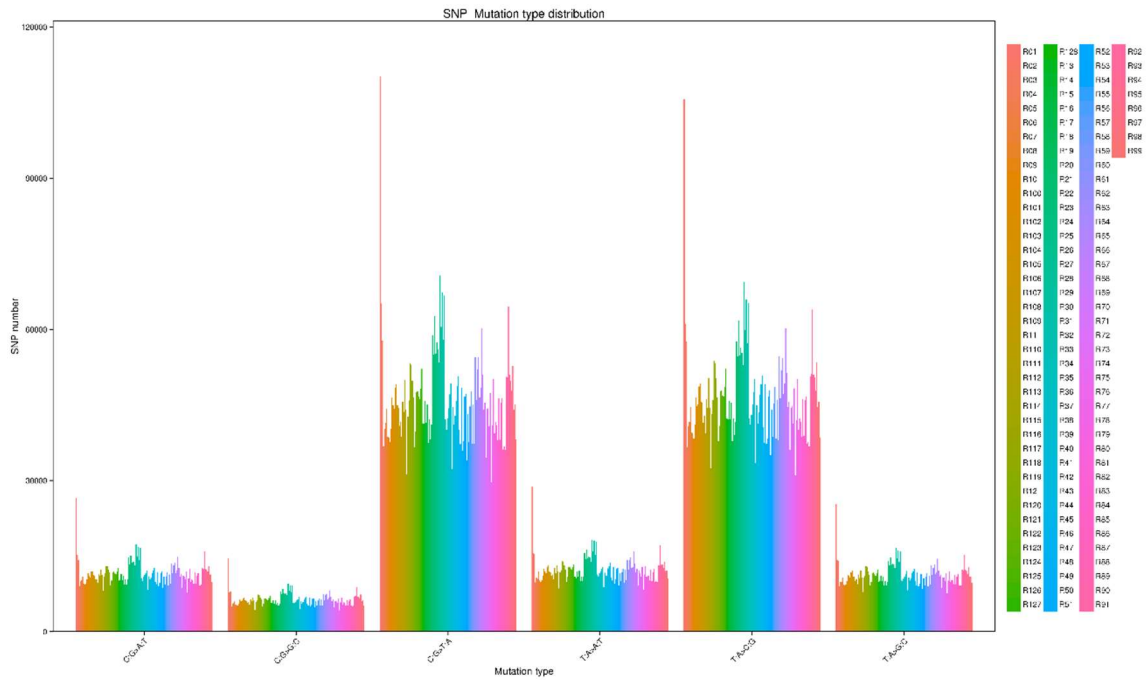

**Figure S1.** Distribution of SNP quality in resequenced lines. R1 and R2 represent female and male parents, respectively. R3-R128 represents the individuals of the RILs population.

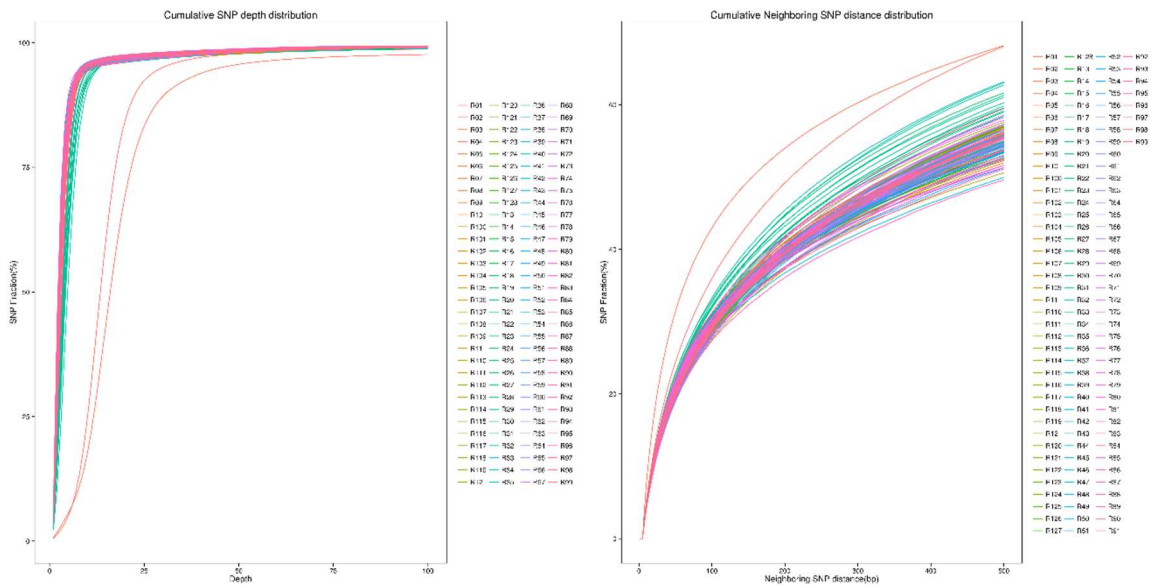

**Figure S2.** Distribution of SNP mutation types in resequenced lines. R1 and R2 represent female and male parents, respectively. R3-R128 represents the individuals of the RILs population.

**Table S1.** Results of the resequencing of parents and 126 RILs population.

**Table S2.** The physical distance of the blocks in the genetic map.

**Table S3.** The genotype of all the markers mapped on the map. R1 and R2 represent female and male parents, respectively. R3-R128 represents the individuals of the RILs population.

**Table S4.** The LOD, additive effect, and PVE score of all the markers in the genetic map.

**Table S5.** The number of the candidate genes in the confidence intervals of the loci in different database analysis.

**Table S6.** The GO, KEGG, COG, Swissprot, Nr annotation results of the candidate genes in the confidence intervals of the locus of fruit bitterness.

**Table S7.** The GO, KEGG, COG, Swissprot, Nr annotation results of the candidate genes in the confidence intervals of the locus of rind color.

**Table S8.** The GO, KEGG, COG, Swissprot, Nr annotation results of the candidate genes in the confidence intervals of the locus of seed coat color.
